# Supplementary material for: Ustilago maydis effector Jsi1 interacts with Topless corepressor, hijacking plant jasmonate/ethylene signaling
Source: PubMed Central journal article supplement (PMC8126959; doi:10.1111/nph.17116), 2021-01-03
Supplement: NPH-229-3393-s001.pdf [file NPH-229-3393-s001.pdf]

## ***New Phytologist* Supporting Information**

Article title: ***Ustilago maydis* effector Jsi1 interacts with Topless corepressor, hijacking plant JA/ET signaling**

Authors: **Martin Darino, Khong-Sam Chia, Joana Marques, David Aleksza, Luz Mayela Soto Jiménez, Indira Saado, Simon Uhse, Michael Borg, Ruben Betz, Janos Bindics, Krzysztof Zienkiewicz, Ivo Feussner, Yohann Petit-Houdenot and Armin Djamei**

Article acceptance date: 16 November 2020

The following Supporting Information is available for this article:

**Methods S1** Gene accession numbers, plasmid cloning, virulence assay in maize, phytohormone measurements, *Pseudomonas syringae* pv. *tomato* (*Pst*) DC3000 infection assay in *A. thaliana*, biolistic transformation of maize for virus-mediated effector overexpression experiments

**Fig. S1** *jsi1* is part of effector cluster 2A and its deletion has no detectable contribution to the virulence of *U. maydis*.

**Fig. S2** Co-IP assay showing that Jsi1 interacts with ZmTPL/TPRs in *Z. mays*.

**Fig. S3** Jsi1 induces the ERF branch in *A. thaliana*.

**Fig. S4** GO-term analysis for biological process of genes differentially expressed in *A. thaliana* lines expressing Jsi1.

**Fig. S5** Prolonged expression of Jsi1 leads to a cell-death phenotype in *Z. mays*, *N. benthamiana* and *A. thaliana*.

**Fig. S6** Heat map from RNA-seq showing the GO category for SA responsive genes.

**Fig. S7** ZmERF4 binds to the C-terminal of TPL but Jsi1 does not interfere with the ZmERF4 binding to ZmTPL1.

**Table S1** Constructs used in this study.

**Table S2.** List of primers used for RT-PCR. Gene

**Table S3** Genes upregulated in *A. thaliana* XVE-*jsi1*-mCh lines upon Jsi1 expression.

**Table S4** Gene upregulated in *A. thaliana* XVE-*jsi1*-mCh lines upon *Jsi1* expression enriched for ERFs transcription-binding sites.

## Methods S1

### Gene accession numbers

*jsi1*: UMAG\_01236, *ZmTpl1*: GRMZM2G030422, *ZmTpl2*: GRMZM2G316967, *ZmTpl3*: GRMZM2G042992, *ZmERF1*: GRMZM2G381441, *ZmERF1a*: GRMZM2G123119, *ZmERF2*: GRMZM2G055180, *ZmERF4*: GRMZM2G310368, *ZmERF105*: GRMZM5G805505, *ZmERF12*: GRMZM2G002119, *ZmACS6*: GRMZM2G164405, *ZmPR5*: GRMZM2G402631, *ZmOSM34*: GRMZM2G136372, *OsTPL1*: Os03g0254700, *Sh\_TPR3*: Sh\_231H24

### Plasmid cloning

Plasmid constructions were performed according to standard molecular cloning procedures (Ausubel et al., 1987; Sambrook & Russell, 2006) or using the GreenGate vector set and cloning conditions (Lampropoulos et al., 2013). All DNA manipulations were performed using the *Escherichia coli* MACH1 strain (Thermo Fisher Scientific, USA). Different modules were blunt-end ligated into the pJet vector (Thermo Fisher Scientific, Waltham, MA, USA) before further GreenGate cloning procedures. All modules used were either amplified by PCR or obtained from the published system. pUG plasmids for *U. maydis* transformation were adapting from p123 vector into GreenGate system compatible for ectopic insertion into *ip* locus (Aichinger et al., 2003).

### Virulence assay in maize

Three independent mutants in the *jsi1* locus (SG200 $\Delta$ *jsi1*-1 to 3) were previously generated by Uhse et al., (2018). To examine whether *jsi1* contributes to virulence, we assayed each of the mutant strain and SG200 strain on 7-day-old maize seedlings (100 plants per strain). We quantified symptom development 12 dpi according to Kämper et al., (2006). Significant differences between *jsi1* mutant strains and SG200 were calculated using Fisher's exact test. Multiple testing corrections were performed using the Benjamini-Hochberg algorithm. We repeated the experiment twice.

### Phytohormone measurements

7-day-old *A. thaliana* plants were sprayed with a 5  $\mu$ M  $\beta$ -estradiol solution and incubated for 6 hours. Phytohormone extraction was performed as described (Zienkiewicz *et al.*, 2020). Phytohormones were ionized in a negative mode and identified in a scheduled multiple reaction monitoring mode with an AB Sciex 4000 QTRAP® tandem mass spectrometer (AB Sciex, Framingham, MA, USA). We performed mass transitions as described (Iven *et al.*, 2012) with modifications specified in the table below. Five replicates per genotype were performed.

| Mass transitions and corresponding conditions for determination of the phytohormones |     |            |                             |                      |                    |
|--------------------------------------------------------------------------------------|-----|------------|-----------------------------|----------------------|--------------------|
| MRM Transitions                                                                      |     | Analyte    | DP [declustering potential] | EP                   | CE                 |
| Q1                                                                                   | Q3  |            |                             | [entrance potential] | [collision energy] |
| 137                                                                                  | 93  | SA         | -25                         | -6                   | -20                |
| 141                                                                                  | 97  | D4-SA      | -25                         | -6                   | -22                |
| 209                                                                                  | 59  | JA         | -30                         | -4,5                 | -24                |
| 214                                                                                  | 62  | D5-JA      | -35                         | -8,5                 | -24                |
| 322                                                                                  | 130 | JA-Ile/Leu | -45                         | -5                   | -28                |
| 325                                                                                  | 133 | D4-JA-Leu  | -80                         | -4                   | -30                |

#### *Pseudomonas syringae* pv. *tomato* (*Pst*) DC3000 infection assay in *A. thaliana*

We performed *Pst* DC3000 infection assay as described (Liu *et al.*, 2015). Briefly, we sprayed 4-week-old *A. thaliana* plants with a solution of 150 nM  $\beta$ -estradiol, 12 hours before *Pst* DC3000 infiltration. We infiltrated leaves with a *Pst* DC3000 solution (OD<sub>600</sub> = 0.0002). On the day of inoculation (0 dpi) and 2 dpi, leaf disks from six independent plants per genotype were collected. Bacterial proliferation was calculated as colony forming units (cfu) per cm<sup>2</sup> of leaf and visualized on a Log scale (cfu/cm<sup>2</sup>). Statistical differences among the different genotypes were calculated using Tukey's HSD post-hoc test. The experiment was repeated three times.

#### Biolistic transformation of maize for virus-mediated effector overexpression experiments

Viral overexpression constructs were cloned via restriction enzyme XbaI and NotI which is based on the Foxtail mosaic virus (FoMV) described by Bouton *et al.*, (2018). pFoMV-Jsi1<sub>27-641</sub>, pFoMV-Jsi1<sub>m27-641</sub> and pFoMV-GFP were cloned by ligating insert fragment containing P19 silencing suppressor sequence followed by porcine teschovirus-1 2A (P2A) and CDS sequence (Jsi1<sub>27-641</sub>, Jsi1<sub>m27-641</sub> or GFP) (Kim *et al.*, 2011). P2A sequence function as a unique ribosome skipping sequence and allow multiple proteins to express from the same RNA

transcript by putting it in between protein-coding sequences. 7-day-old maize seedlings were bombarded with the following viral constructs: pFoMV-Jsi1<sub>27-641</sub>, pFoMV-Jsi1m<sub>27-641</sub> and pFoMV-GFP using 7 µg of each plasmid as described by Djamei et al., (2011). Seven days after bombardment, third leaves (non-bombarded leaves) were harvest and used for gene expression analysis. Gene expression was evaluated by qPCR following the same protocol described in the material and methods section. For trypan blue staining, we followed the protocol described by Fernández-Bautista et al., (2016) using 10 dpi maize infected leaves with the virus.

**Fig. S1** *jsi1* is part of effector cluster 2A and its deletion has no detectable contribution to the virulence of *Ustilago maydis* (*U. maydis*). **(a)** Schematic representation of the *U. maydis* cluster 2a according to Kämper et al., (2006), *UMAG\_01236* and *UMAG\_01237* are in bold for being the only two genes of the cluster with a DLNxxP motif. **(b)** *UMAG\_01236* is transcriptionally induced during infection. We extracted norm\_count (normalized *U. maydis* reads counts) and FC (log<sub>2</sub> (Fold change)) from Lanver et al., (2018). **(c)** Phylogenetic tree of the Topless (TPL) protein orthologs. Scale bar indicates Jukes-Cantor distance. Bootstrap values are shown in branches. At, *Arabidopsis thaliana*; Zm, *Zea mays*; Os, *Oryza sativa*; Sh, *Saccharum hybrid*. **(d)** We used Jsi1<sub>27-641</sub> as prey and ZmTPL2, ZmTPL3, and N and C terminal regions from both ZmTPLs (ZmTPL<sup>Nt</sup> and ZmTPL<sup>Ct</sup>) as bait in a Yeast two-Hybrid (Y2H) assay. The letters -L, -W and -H indicate medium lacking leucine, tryptophan and histidine, respectively. **(e)** Anti-TPL antibody was tested for specificity by using TPL protein from different plant species. We fused ZmTPL1, ZmTPL2 and ZmTPL3, OsTPL1 and ShTPR3 to GFP and independently infiltrated in *Nicotiana benthamiana* (*N. benthamiana*) leaves. We pulled-down the fused proteins from protein extracts using anti-GFP antibody. Western blot analysis with anti-GFP and TPL-specific antibody show that the TPL antibody can detect TPL proteins from different plants species. The red asterisk indicates full-length of the different TPL/TPRs fused to GFP and GFP protein. The black asterisk indicates the TPL/TPR proteins from *N. benthamiana* that were pulled-down by the TPL/TPRs fused to GFP. **(f)** Filamentation test on charcoal containing plates for all the strains that we used for virulence analysis and for confocal imaging. Filamentation on charcoal plates indicates that the tested strains are not affected in their ability to form hyphae, a morphological prerequisite for virulence. **(g)** Disease rating of Early Golden Bantam maize seedlings infected with *jsi1* mutants or progenitor strain SG200. We compared the virulence phenotype of three independent mutants with the virulence phenotype of the progenitor strain. Numbers above the columns indicate total number of plants infected in two independent experiments. Statistic differences between *jsi1* mutant strains and the SG200 progenitor were calculated using Fisher's exact test. Multiple testing corrections were performed using the Benjamini-Hochberg algorithm, (ns, not significant).

**a**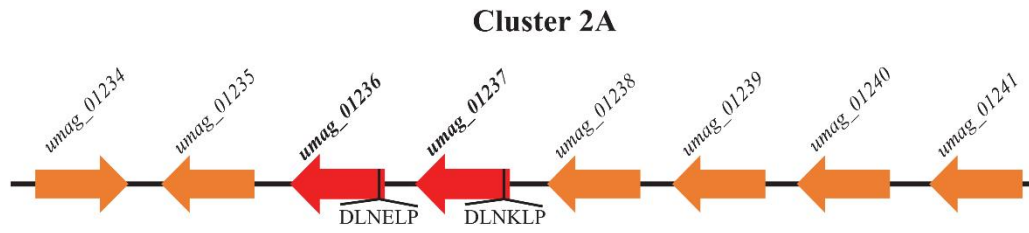**b**

| Days post infection | UMAG_01236     |      |
|---------------------|----------------|------|
| Axenic conditions   | 1,48±0,35      | -    |
| 0,5                 | 0              | 0,62 |
| 1                   | 10,38±12,45    | 3    |
| 2                   | 225,40±16,82   | 7,17 |
| 4                   | 1286,7±93,81   | 9,67 |
| 6                   | 1011,21±115,56 | 9,32 |
| 8                   | 751,57±92,95   | 8,90 |
| 12                  | 277,46±68,16   | 7,47 |

**c**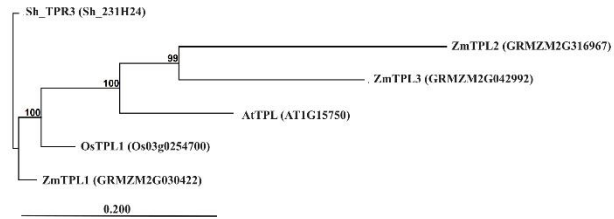**d**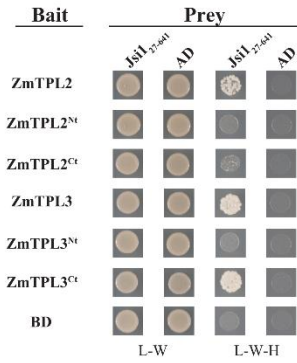**e**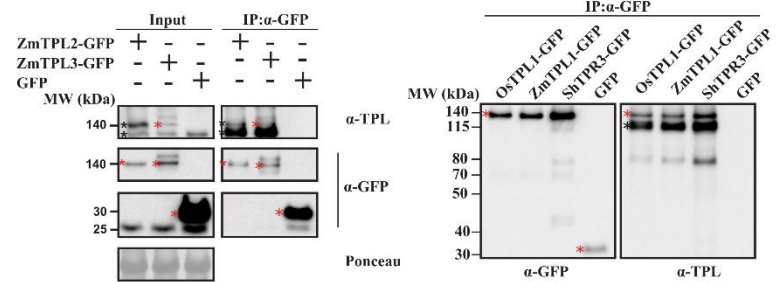**f**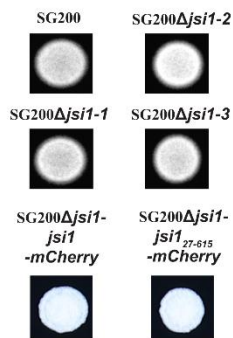**g**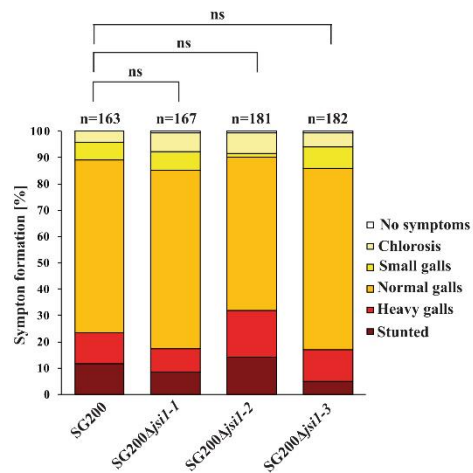

**Fig. S2** Co-immunoprecipitation (Co-IP) assay showing that Jsi1 interacts with ZmTPL/TPRs in *Zea mays*. We infected maize seedlings with each of the *Ustilago maydis* strains expressing Jsi1-3xHA, Jsi1m-3xHA and mCherry-3xHA and performed a Co-IP using anti-HA antibody. TPL-specific antibody shows that endogenous maize TPL/TPR proteins are co-purified with Jsi1-3xHA but not with Jsi1m-3xHA nor mCherry-3xHA. Red asterisks indicate the full-length proteins of Jsi1-3xHA, Jsi1m-3xHA and mCherry-3xHA. Ponceau staining was used as loading control. Uncropped blots from Figure 1c (a) and an independent second replicate of the experiment (b). mCherry protein was developed after 15 or 30 min of exposure while Jsi1 and Jsi1m were developed after 3 to 4 hours of exposure.

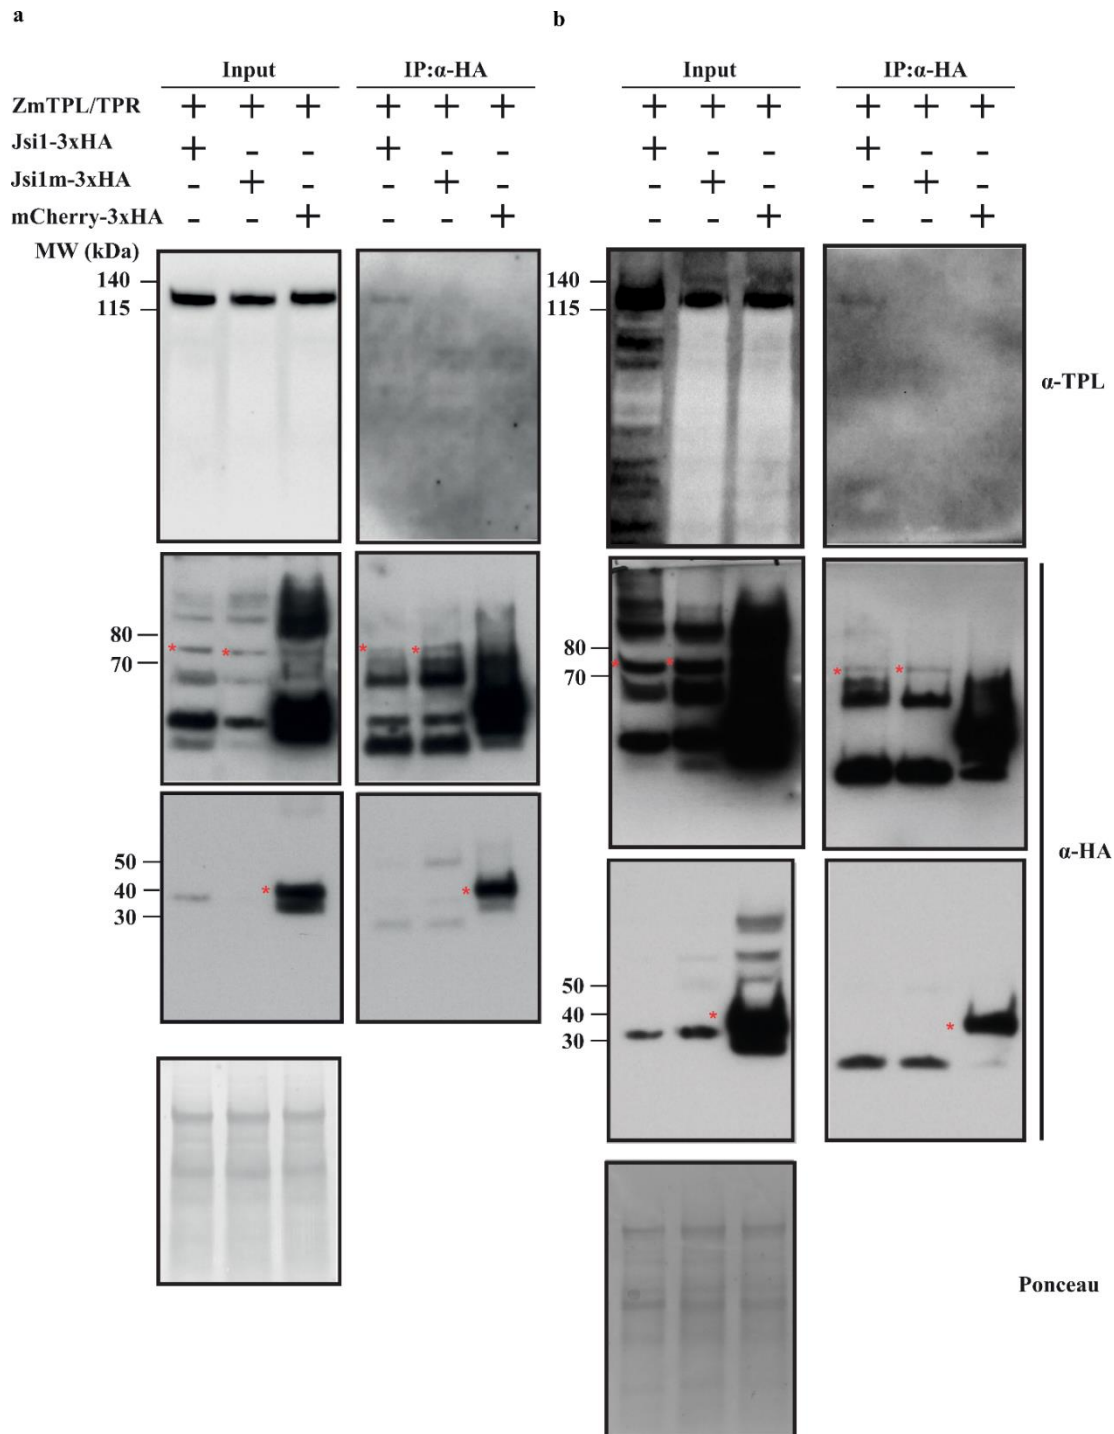



**Fig. S3** Jsi1 induces the ethylene response factor (ERF) branch in *Arabidopsis thaliana* (*A. thaliana*). (a) We used Jsi1<sub>27-641</sub> as prey and AtTPL, AtTPR1, AtTPR2 and AtTPR4 as bait to test if Jsi1 can interact with the AtTPL/AtTPR proteins in Y2H assay. The letters -L, -W and -H indicate medium lacking leucine, tryptophan and histidine, respectively. (b) Estradiol inducible XVE-jsi1-mCh 1 and 2, and control XVE-mCh *Arabidopsis*-lines. We treated *A. thaliana* seedlings with 5 $\mu$ M of  $\beta$ -estradiol for 6 hours. We determined the expression levels of the proteins, Jsi1-mCherry or mCherry alone, using anti-mCherry antibody. Anti-Histone 3 antibody (Abcam) was used as loading control. Asterisk indicates full-length protein. (c) Principal Coordinates Analysis (PCA) demonstrates that RNA-seq libraries from induced XVE-jsi1-mCh lines grouped together while libraries from XVE-mCh control line either treated with or without  $\beta$ -estradiol cluster together separately from the Jsi1 lines. (d) Total Salicylic acid content in shoots of fresh *A. thaliana* seedlings. We sprayed XVE-jsi1-mCh 1 and 2 and XVE-mCherry lines with 5 $\mu$ M of  $\beta$ -estradiol to induce jsi1-mCh and mCherry expression, respectively. Each bar represents mean $\pm$ SD of five replicates. Significant differences between *A. thaliana* XVE-jsi1-mCh and XVE-mCherry lines were calculated using Kruskal Wallis test followed by Dunn multiple comparison test ( $P$  value < 0.05). Different letters above the bars indicate statistically significant differences among the lines. (e) qPCR validation of genes from the RNA-seq. Gene induction was represented for each Jsi1 line. Fold Change  $\pm$  Standard Deviation (FC $\pm$ SD) is relative to the expression in the control mCherry line and normalized to the actin RNA expression values for three independent replicates. We evaluated statistically significant differences between gene expression in each Jsi1 lines related to the control mCherry line using ANOVA followed by Dunnett's multiple compared test (\*\*\*\* $P$  < 0.0001, \*\*\* $P$  < 0.001, \*\* $P$  < 0.01, \* $P$  < 0.05, ns, not significant).

**a**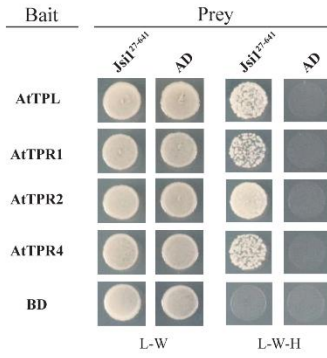**b**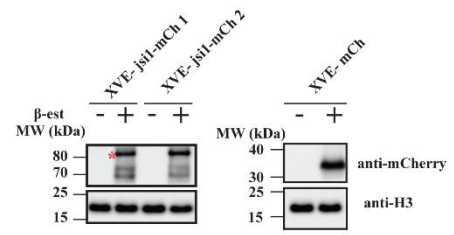**c**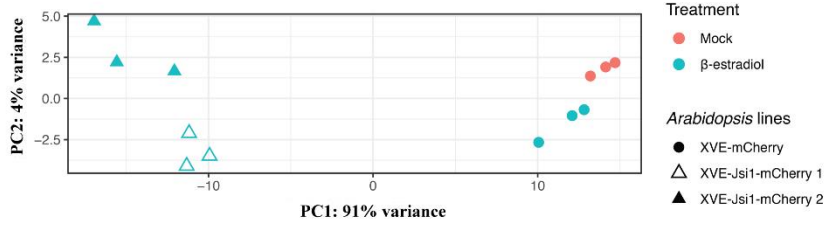**d**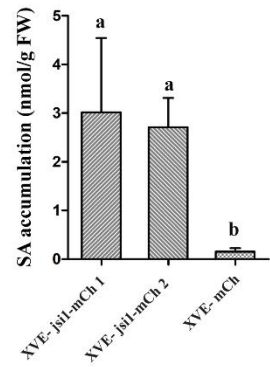**e**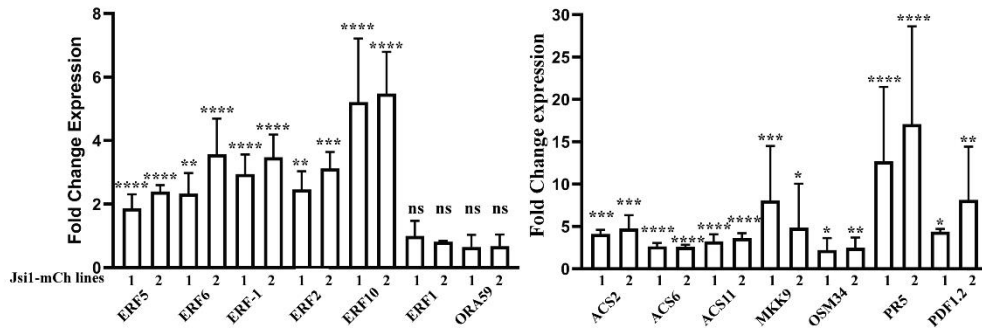

**Fig. S4** GO-term analysis for biological process of genes differentially expressed in *Arabidopsis thaliana* lines expressing Jsi1. **(a)** Go-term analysis for the 1,090 differentially expressed genes in lines expressing Jsi1. **(b)** GO analysis for the 269 genes found to be enriched in transcription factor binding sites for Ethylene response factors (ERFs) protein. Percentage of genes were calculated for each category related to the total number of genes. All GO categories showed  $P$  value  $<0.05$ . GO categories with more than 20 genes were represented in the graph.

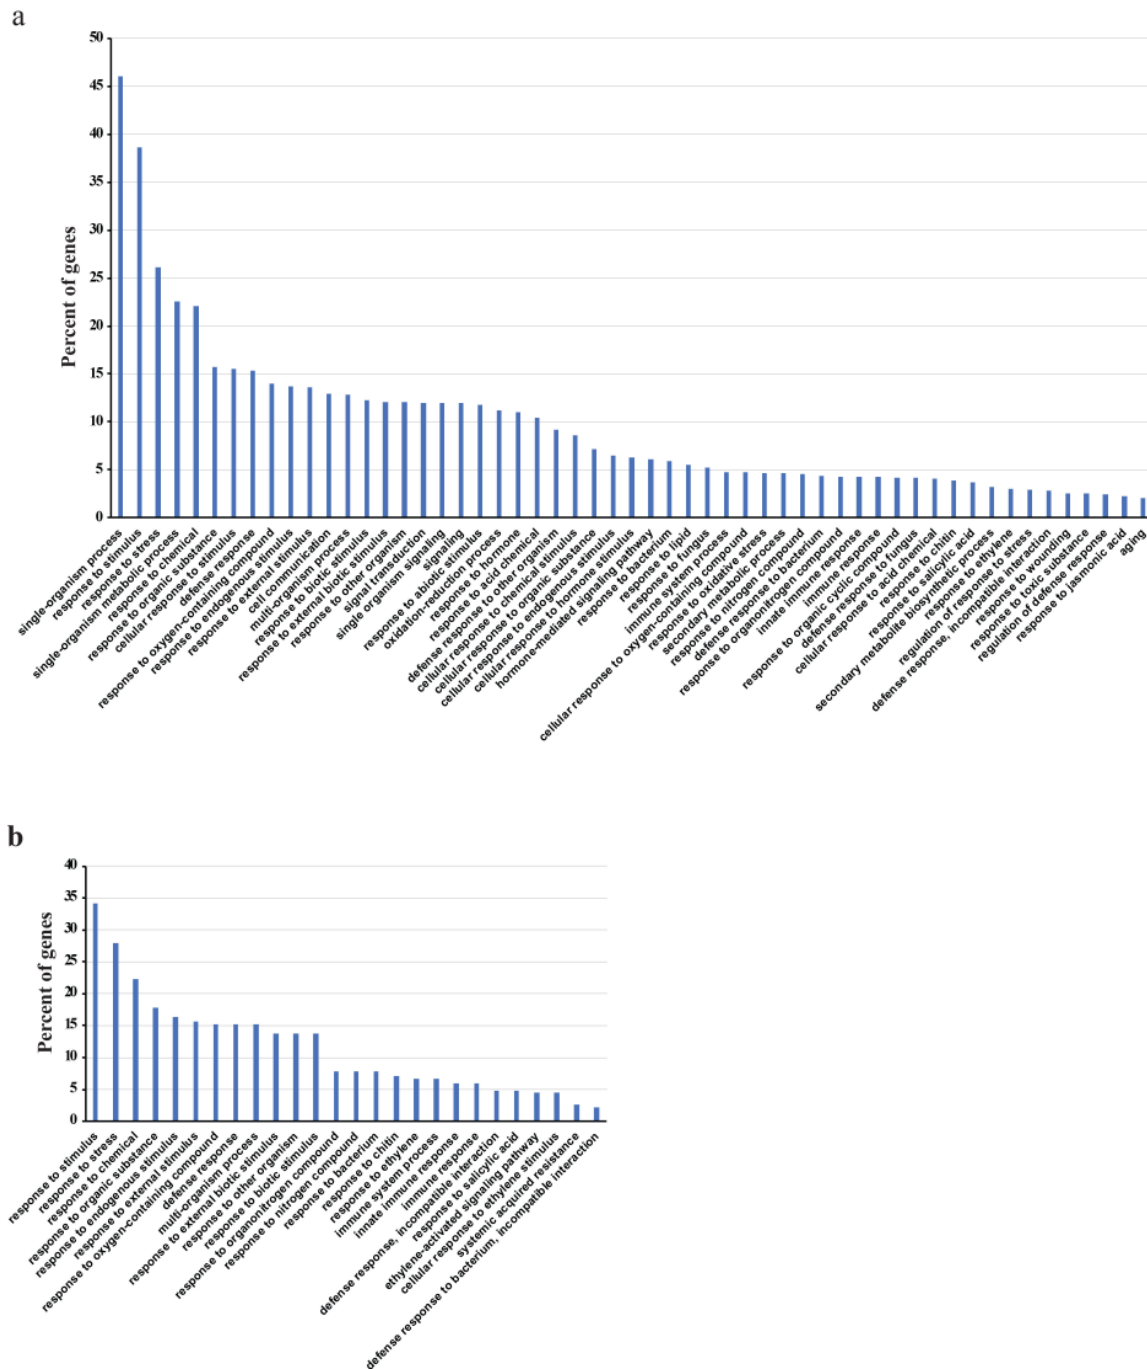

**Fig. S5** Prolonged expression of Jsi1 leads to a cell-death phenotype in *Zea mays*, *Nicotiana benthamiana* (*N. benthamiana*) and *Arabidopsis thaliana* (*A. thaliana*). **(a) Left panel**, Trypan blue assay on detached maize leaves expressing pFoMV-GFP, pFoMV-Jsi1 and pFoMV-Jsi1m at 10 days post-infection (dpi) (n=2). Yellow arrow indicates cell-death in the leaf expressing Jsi1. Bars 1 cm. **Right panel**, *P19* genes expression levels in maize leaves infected with virus carrying pFoMV-GFP, pFoMV-Jsi1 and pFoMV-Jsi1m after 7 dpi. Fold Change  $\pm$  Standard Deviation (FC $\pm$ SD) is relative to the expression in maize plants without virus infection and normalized to the cyclin-dependent kinase (CDK) RNA expression values. Values shown are the means of two replicates. Statistically significant differences between genes expressed in maize plants infected with pFoMV-GFP and pFoMV-Jsi1 or pFoMV-Jsi1m were calculated using Mann-witnes test (\*, *P* value <0.05). **(b) Left panel**, Cell-death phenotype by Jsi1 in *N. benthamiana* leaves at 5 dpi. Bars 1.5 cm. **Right panel**, Co-IP showing association only between Jsi1 and ZmTPL1 while Jsi1m weakly interacts with ZmTPL1 upon co-expression in *N. benthamiana*. Co-immunoprecipitated proteins were detected with anti-myc and anti-mCherry antibodies. **(c)** We sprayed 4-weeks old *A. thaliana* plants with 150nM and 5 $\mu$ M of  $\beta$ -estradiol. We took pictures at 1-, 2- and 3- days post  $\beta$ -estradiol treatment (dpt). White arrows indicate visible cell-death in *A. thaliana* lines expressing Jsi1. Bars 2 cm.

**a**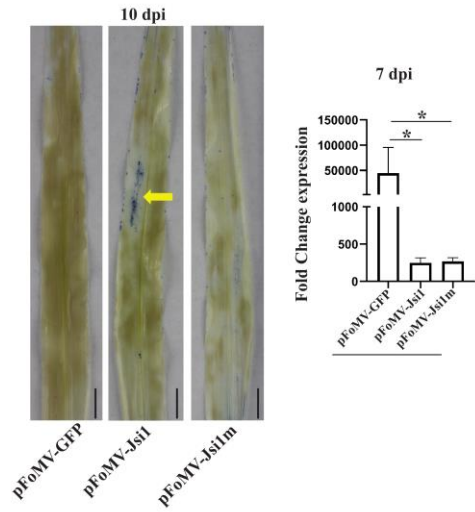**b**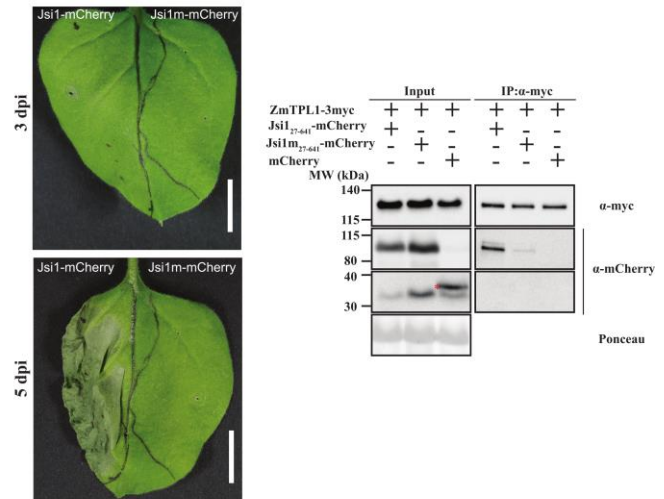**c**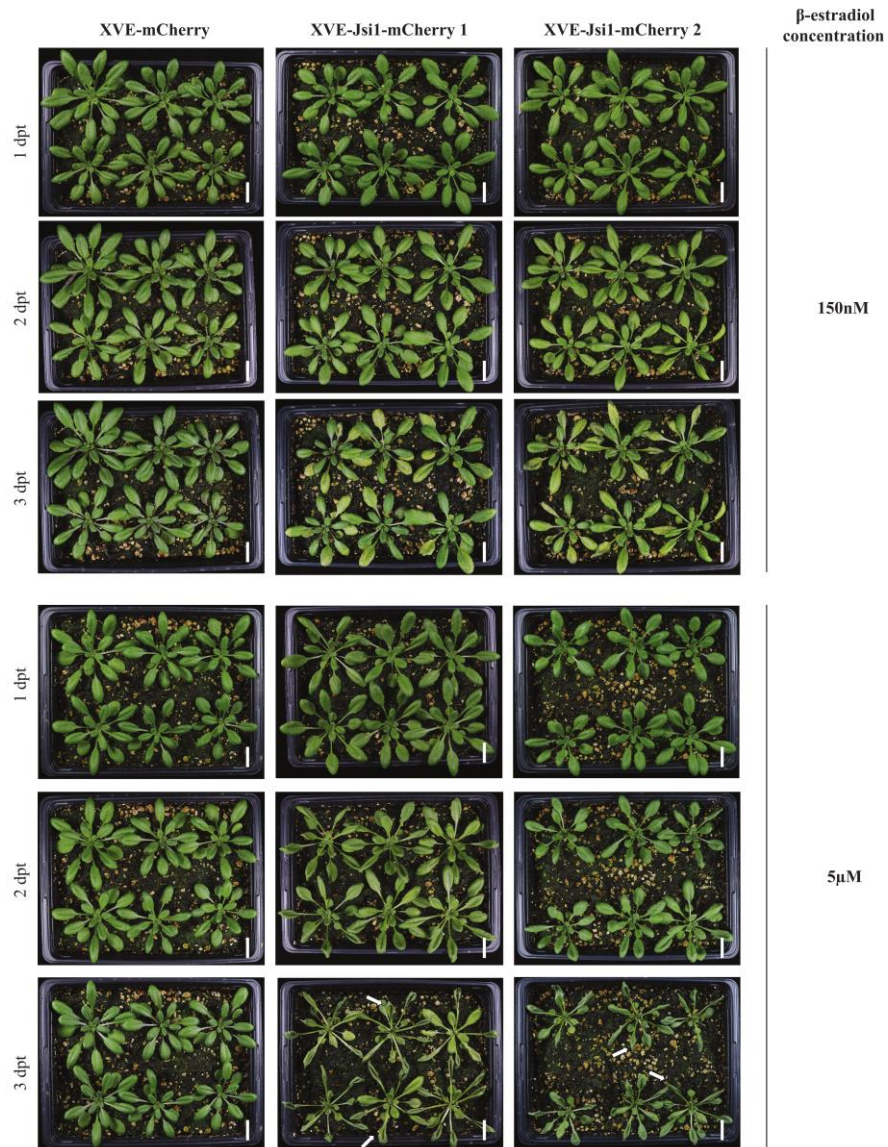

**Fig. S6** Heat map from RNA-seq showing the GO category for SA responsive genes. <sup>a</sup>Genes enriched in transcription binding sites (TBS) from ERF TFs with repression activity. Numbers under lines represent independent biological replicates for each line and treatment with or without  $\beta$ -estradiol.

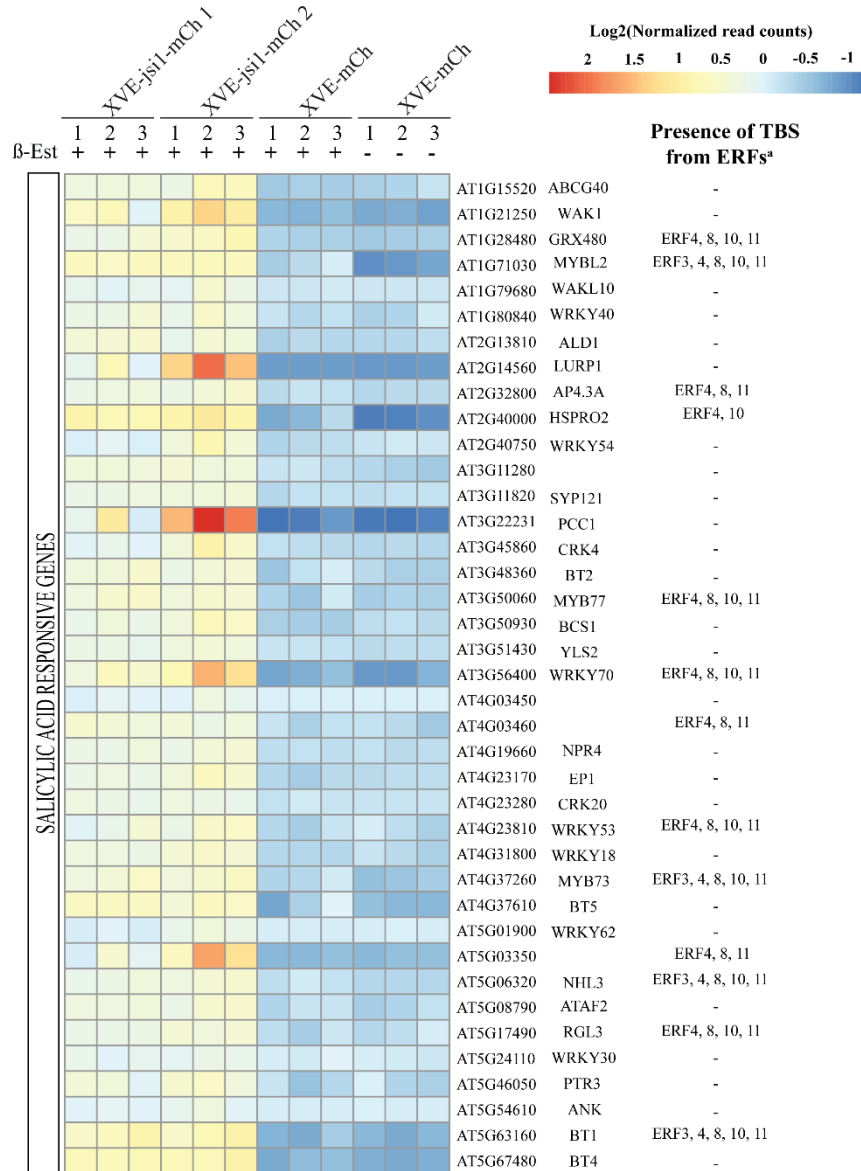

**Fig. S7** ZmERF4 binds to the C-terminus of TPL but Jsi1 does not interfere with the ZmERF4 binding to ZmTPL1. **(a)** We tested ZmERF4 for interaction with full-length ZmTPL1, N and C-terminal parts of ZmTPL1 in Yeast two-Hybrid (Y2H) assay. The letters -L, -W and -H indicate medium lacking leucine, tryptophan and histidine, respectively. **(b)** Co-immunoprecipitation (Co-IP) showing that Jsi1 does not interfere with the ZmERF4 binding to ZmTPL1. Co-IP was performed using anti-myc antibody. Quantification of pulled-down proteins signal of ZmERF4 and the different Jsi1 versions were normalized to their respective pulled-down ZmTPL1 protein signal. Then, Fold Change (FC) for each protein was expressed relative to the value observed in ZmTPL1 co-expressed with Jsi1 and ZmERF4. FC $\pm$ SD is a mean of three biological replicates, error bar represents standard deviation

**a**

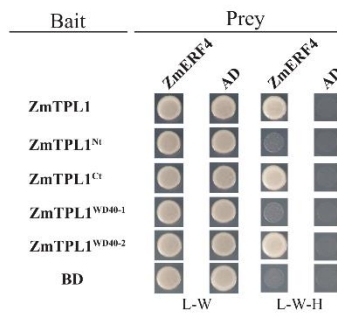

**b**

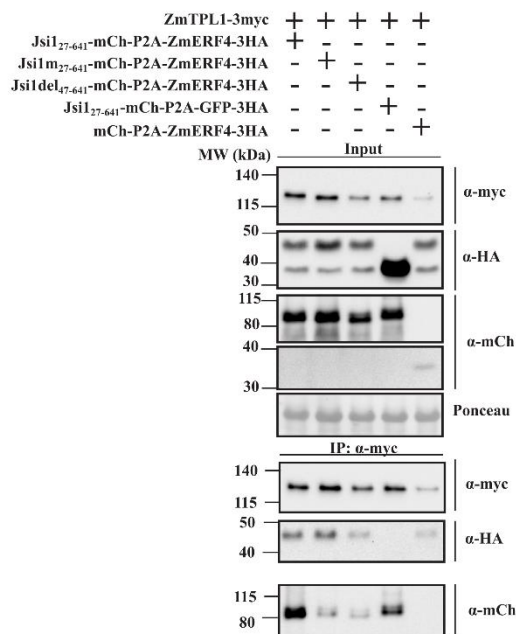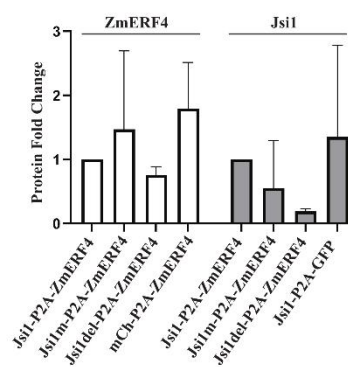

**Table S1** Constructs used in this study

| Construct                                                                   | Resistance                | Description                                                                     |
|-----------------------------------------------------------------------------|---------------------------|---------------------------------------------------------------------------------|
| pGG187 <sup>1</sup> -pADH1-GAL4BD-Myc-ZmTPL1-adh1T                          | Tryptophan, Spectinomycin |                                                                                 |
| pGG187-pADH1-GAL4BD-Myc-ZmTpl1 <sup>Nt</sup> <sub>1-218</sub> -adh1T        | Tryptophan, Spectinomycin |                                                                                 |
| pGG187-pADH1-GAL4BD-Myc-ZmTpl1 <sup>Ct</sup> <sub>215-1128</sub> -adh1T     | Tryptophan, Spectinomycin |                                                                                 |
| pGG187-pADH1-GAL4BD-Myc-ZmTpl1 <sup>WD40-1</sup> <sub>215-721</sub> -adh1T  | Tryptophan, Spectinomycin |                                                                                 |
| pGG187-pADH1-GAL4BD-Myc-ZmTpl1 <sup>WD40-2</sup> <sub>722-1128</sub> -adh1T | Tryptophan, Spectinomycin |                                                                                 |
| pGG187-pADH1-GAL4BD-Myc-eYFP-adh1T                                          | Tryptophan, Spectinomycin | Bait constructs (GAL4BD) used for Y2H assay. Yeast strain AH109(MAT $\alpha$ )  |
| pGG187-pADH1-GAL4BD-Myc-ZmTPL2-adh1T                                        | Tryptophan, Spectinomycin |                                                                                 |
| pGG187-pADH1-GAL4BD-Myc-ZmTpl2 <sup>Nt</sup> <sub>1-217</sub> -adh1T        | Tryptophan, Spectinomycin |                                                                                 |
| pGG187-pADH1-GAL4BD-Myc-ZmTpl2 <sup>Ct</sup> <sub>213-1082</sub> -adh1T     | Tryptophan, Spectinomycin |                                                                                 |
| pGG187-pADH1-GAL4BD-Myc-ZmTPL3-adh1T                                        | Tryptophan, Spectinomycin |                                                                                 |
| pGG187-pADH1-GAL4BD-Myc-ZmTpl3 <sup>Nt</sup> <sub>1-219</sub> -adh1T        | Tryptophan, Spectinomycin |                                                                                 |
| pGG187-pADH1-GAL4BD-Myc-ZmTpl3 <sup>Ct</sup> <sub>216-1141</sub> -adh1T     | Tryptophan, Spectinomycin |                                                                                 |
| pGG187-pADH1-GAL4BD-Myc-AtTPL-adh1T                                         | Tryptophan, Spectinomycin |                                                                                 |
| pGG187-pADH1-GAL4BD-Myc-AtTPR1-adh1T                                        | Tryptophan, Spectinomycin |                                                                                 |
| pGG187-pADH1-GAL4BD-Myc-AtTPR2-adh1T                                        | Tryptophan, Spectinomycin |                                                                                 |
| pGG187-pADH1-GAL4BD-Myc-AtTPR4-adh1T                                        | Tryptophan, Spectinomycin |                                                                                 |
| pGG446 <sup>1</sup> -pADH1-Jsi1 <sub>27-641</sub> -GAL4AD-HA-adh1T          | Leucine, Spectinomycin    | Prey constructs (GAL4AD) used for Y2H assay. Yeast strain Y187 (MAT $\alpha$ ). |
| pGG446-pADH1-Jsi1 <sub>m27-641</sub> -GAL4AD-HA-adh1T                       | Leucine, Spectinomycin    |                                                                                 |
| pGG446-pADH1-GAL4AD-HA-eYFP-adh1T                                           | Leucine, Spectinomycin    |                                                                                 |
| pGADT7-pADH1-GAL4AD-HA-ZmERF4-adh1T                                         | Leucine, Ampicillin       |                                                                                 |



Continuation of **Table S1**

| Construct                                                                      | Resistance                   | Description                                                                                                        |
|--------------------------------------------------------------------------------|------------------------------|--------------------------------------------------------------------------------------------------------------------|
| pGGZ001-35S-Ω-ZmTPL1-3xMyc-Ubq10T-BastaR                                       | Basta, Spectinomycin         |                                                                                                                    |
| pGGZ001-35s-Ω-ZmTPL1-eGFP-Ubq10-BastaR                                         | Basta, Spectinomycin         |                                                                                                                    |
| pGGZ001-35s-Ω-ZmTPL2-eGFP-Ubq10-BastaR                                         | Basta, Spectinomycin         |                                                                                                                    |
| pGGZ001-35s-Ω-ZmTPL3-eGFP-Ubq10-BastaR                                         | Basta, Spectinomycin         |                                                                                                                    |
| pGGZ001-35S-Ω-Jsi1 <sub>27-641</sub> -mcherry-Ubq10T-BastaR                    | Basta, Spectinomycin         |                                                                                                                    |
| pGGZ001-35S-Ω-Jsi1 <sub>m27-641</sub> -mcherry-Ubq10T-BastaR                   | Basta, Spectinomycin         |                                                                                                                    |
| pGGZ001-35S-Ω-mcherry-3xHA-Ubq10T-HygR                                         | Hygromycin,<br>Spectinomycin |                                                                                                                    |
| pGGZ001-35S-Ω-ZmERF4-3xHA-Ubq10T-BastaR                                        | Basta, Spectinomycin         |                                                                                                                    |
| pGGZ001-35S-Ω-YFP-3xHA-Ubq10T-HygR                                             | Hygromycin,<br>Spectinomycin |                                                                                                                    |
| pGGZ001-35S-Ω-Jsi1 <sub>27-641</sub> -mcherry-P2A-ZmERF4-3xHA-Ubq10T-BastaR    | Basta, Spectinomycin         |                                                                                                                    |
| pGGZ001-35S-Ω-Jsi1 <sub>m27-641</sub> -mcherry-P2A-ZmERF4-3xHA-Ubq10T-BastaR   | Basta, Spectinomycin         | Constructs used for Co-IP experiments performed in <i>N. benthamiana</i> . Agrobacterium strain GV3101 pMP90 pSoup |
| pGGZ001-35S-Ω-Jsi1 <sub>del47-641</sub> -mcherry-P2A-ZmERF4-3xHA-Ubq10T-BastaR | Basta, Spectinomycin         |                                                                                                                    |
| pGGZ001-35S-Ω-Jsi1 <sub>27-641</sub> -mcherry-P2A-GFP-3xHA-Ubq10T-BastaR       | Basta, Spectinomycin         |                                                                                                                    |
| pGGZ001-35S-Ω-mcherry-P2A-ZmERF4-3xHA-Ubq10T-BastaR                            | Basta, Spectinomycin         |                                                                                                                    |
| pGGZ001-35S-Ω-OsTPL1-GFP-Ubq10T-BastaR                                         | Basta, Spectinomycin         |                                                                                                                    |
| pGGZ001-35S-GFP-Ubq10T-BastaR                                                  | Basta, Spectinomycin         |                                                                                                                    |
| pGGZ001-35S-Ω-myc-mCherry-MGG_15391 <sub>24-222</sub> -Ubq10T-BastaR           | Basta, Spectinomycin         |                                                                                                                    |
| pGGZ001-35S-Ω-myc-mCherry-MGG_15391 <sub>m24-222</sub> -Ubq10T-BastaR          | Basta, Spectinomycin         |                                                                                                                    |
| pGGZ001-35S-Ω-mCherry-Sr10312 <sub>23-631</sub> -Ubq10T-BastaR                 | Basta, Spectinomycin         |                                                                                                                    |
| pGGZ001-35S-Ω-mCherry-Sr10312 <sub>m23-631</sub> -Ubq10T-BastaR                | Basta, Spectinomycin         |                                                                                                                    |
| pGGZ001-35S-Ω-SPSC_03537 <sub>21-653</sub> -mCherry-Ubq10T-BastaR              | Basta, Spectinomycin         |                                                                                                                    |
| pGGZ001-35S-Ω-SPSC_03537 <sub>m21-653</sub> -mCherry-Ubq10T-BastaR             | Basta, Spectinomycin         |                                                                                                                    |
| pGGZ001-35S-Ω-ShTPR3-GFP-Ubq10T-BastaR                                         | Basta, Spectinomycin         |                                                                                                                    |

Continuation of **Table S1**

| Construct                                                        | Resistance                | Description                                                                           |
|------------------------------------------------------------------|---------------------------|---------------------------------------------------------------------------------------|
| pUG <sup>2</sup> -P <sub>cmu1</sub> -Jsi1-3xHA-nosT              | Carboxin, Spectinomycin   |                                                                                       |
| pUG-P <sub>cmu1</sub> -Jsi1m-3xHA-nosT                           | Carboxin, Spectinomycin   | Constructs used for Co-IP experiment in maize. SG200 strain                           |
| pUG-P <sub>cmu1</sub> -SP <sub>cmu1</sub> -mCherry-3xHA-nosT     | Carboxin, Spectinomycin   |                                                                                       |
| pGGZ001-35S-Ω-GFP-nls-Ubq10T-HygR                                | Hygromycin, Spectinomycin | Constructs used for Biolistic transformation of maize                                 |
| pGGZ001-35S-Ω-ZmTPL1-GFP-Ubq10T-BastaR                           | Basta, Spectinomycin      |                                                                                       |
| pUG-P <sub>otef</sub> -Jsi1-3xHA-tNOS                            | Carboxin, Spectinomycin   | Construct used for secretion experiment in axenic culture. AB33 strain                |
| pUG-P <sub>cmu1</sub> -Jsi1-mCherry-HA-tNOS                      | Carboxin, Spectinomycin   | Constructs used for secretion experiment <i>in planta</i> . SG200Δ <i>jsi1</i> strain |
| pUG-P <sub>cmu1</sub> -Jsi1 <sub>27-641</sub> -mCherry-HA-tNOS   | Carboxin, Spectinomycin   |                                                                                       |
| pGGZ001-35s:XVE-Jsi1 <sub>27-641</sub> -mCherry-Myc-Ubq10-BastaR | Basta, Spectinomycin      | Constructs used for <i>A.thaliana</i> transformation                                  |
| pGGZ001-35s:XVE-mCherry-Myc-Ubq10-BastaR                         | Basta, Spectinomycin      |                                                                                       |
| pFoMV-P19-P2A- Jsi1 <sub>27-641</sub> -myc                       | Kanamycin                 |                                                                                       |
| pFoMV-P19-P2A- Jsi1m <sub>27-641</sub> -myc                      | Kanamycin                 | Constructs used for viral infection in maize                                          |
| pFoMV-P19-P2A- GFP-myc                                           | Kanamycin                 |                                                                                       |

<sup>1</sup> pGG187 and pGG446 are plasmids designed for Golden gate cloning using the pGBKT7 and pGADT7 (Clontech®) as backbones respectively.

<sup>2</sup> pUG is a vector designed from the p123 vector for Golden gate cloning (Lampropoulos *et al.*, 2013).

**Table S2** List of primers used for RT-PCR

| Primer                | Gene ID   | 5'-3' sequence             |
|-----------------------|-----------|----------------------------|
| ERF-1_F               | AT4G17500 | TTGCGGCGGAGATTAGAGAC       |
| ERF-1_R               |           | ATTCAACAAAGCGCGGGAAC       |
| ERF1_F <sup>2</sup>   | AT3G23240 | TCAGAAGACCCCAAAGCTCCTCA    |
| ERF1_R <sup>2</sup>   |           | TTGATCACCGCTCCGTGAAGTTAG   |
| ERF2_F                | AT5G47220 | TTCACTGCCGTCTCCGTAAC       |
| ERF2_R                |           | GCGGTTAAAGTCGAGCCAAC       |
| ERF5_F                | AT5G47230 | GGTGGAGAGACGTTTCCGTT       |
| ERF5_R                |           | ACCAAACGGTGGATGAGGAG       |
| ERF6_F                | AT4G17490 | TTGTACAGGCCACGACCATC       |
| ERF6_R                |           | GGCGATTCTGAATTTCCCGC       |
| ERF10_F               | AT1G03800 | CCCCCGGAGATAACATGTCTG      |
| ERF10_R               |           | CAACCTTTCCGAGACGGTGA       |
| ORA59_F               | AT1G06160 | CTCTGCTTCTACAATTTTTATG     |
| ORA59_R               |           | CTACACATCTATACATGTTTCC     |
| ACS2_F <sup>5</sup>   | AT1G01480 | CATGTTCTGCCTTGCGGATC       |
| ACS2_R <sup>5</sup>   |           | ACCTGTCCGCCACCTCAAGT       |
| ACS6_F                | AT4G11280 | ACGAGACGGTTGCTTTCTGT       |
| ACS6_R                |           | AGCGGGTTTGAAGGATTGGT       |
| ACS11_F               | AT4G08040 | TTACCATGGCTTGCCAGCTT       |
| ACS11_R               |           | TCGTTAGCCGAGGTTGATCC       |
| MKK9_F                | AT1G73500 | CGCCGTACAGATTCACCGTA       |
| MKK9_R                |           | TTTAGCGAATCCGGCGAGTT       |
| OSM34_F               | AT4G11650 | CACCAAACACGTTGGCTGAG       |
| OSM34_R               |           | TGTCCGTTTATGTCTGCGGT       |
| PR5_F                 | AT1G75040 | CATCACCCACAGCACAGAGA       |
| PR5_R                 |           | ACGGTGGTAGGGCAATTGTT       |
| PDF1.2_F <sup>1</sup> | AT5G44420 | TTGCTGCTTTCGACGCA          |
| PDF1.2_R <sup>1</sup> |           | TGTCCCACTTGGCTTCTCG        |
| actin2_F <sup>3</sup> | AT3G18780 | TCGGTGGTTCCATTCTTGCT       |
| actin2_R <sup>3</sup> |           | GCTTTTTAAGCCTTTGATCTTGAGAG |

Continuation of **Table S2**

| Primer               | Gene ID       | 5'-3' sequence            |
|----------------------|---------------|---------------------------|
| ZmERF1_F             |               | CAGAGGAGCAGACCATGTCC      |
| ZmERF1_R             | GRMZM2G381441 | GTTCTTGACTTGTGCGTGCC      |
| ZmERF1a_F            |               | TAACCCATAGCGAATGGCGG      |
| ZmERF1a_R            | GRMZM2G123119 | CTGAACTCGATCCCCAACCC      |
| ZmERF2_F             |               | GCCGTTCAACTCGATCACTTCTTTC |
| ZmERF2_R             | GRMZM2G055180 | GGAACGACCGAGAGGGAGAG      |
| ZmERF105_F           |               | TGGTCCCGATGGTGAACAAA      |
| ZmERF105_R           | GRMZM5G805505 | GTCTCCCAGTACTGCTCCGA      |
| ZmERF12_F            |               | CTACTCCGTGGCATTCCGTC      |
| ZmERF12_R            | GRMZM2G002119 | AATCCGATCGAGCATCAGCA      |
| ZmACS6_F             |               | GCCTGAACGCGTGCTAATTT      |
| ZmACS6_R             | GRMZM2G164405 | CAGGGACAGTTGGTTCTCGG      |
| ZmPR5_F              |               | GCCGGAATAGGCTCTGCATT      |
| ZmPR5_R              | GRMZM2G402631 | ACGAAGCACGCACACAAATC      |
| ZmOSM34_F            |               | TGATCGACGGCTACAACCTG      |
| ZmOSM34_R            | GRMZM2G136372 | TTCGCAAACAAAGAAGTTGGCT    |
| P19_F                |               | TCCTTGGATCTTGGACGGGA      |
| P19_R                |               | GGGCAAGCTGTAGCAGTTCT      |
| ZmCDK_F <sup>4</sup> |               | CCGTCATCGCCTCACGAAGAG     |
| ZmCDK_R <sup>4</sup> | GRMZM2G149286 | AGAGCCTGCCTTACGGAATTGG    |

<sup>1, 2, 3, 4 and 5</sup> primers pairs from Brown *et al.*, (2003), McGrath *et al.*, (2005), Zhang *et al.*, (2011), Lin *et al.*, (2014) and Schellingen *et al.*, (2014), respectively.

**Table S3** Genes upregulated in *A. thaliana* XVE-Jsi1 lines upon Jsi1 expression.

| AGI code                   | Gene name | Fold change   |                                |                       | <i>P</i> value |                                |                       |
|----------------------------|-----------|---------------|--------------------------------|-----------------------|----------------|--------------------------------|-----------------------|
|                            |           | XVE:<br>JSI-1 | McGrath <i>et al.</i> , (2005) |                       | XVE:<br>JSI-1  | McGrath <i>et al.</i> , (2005) |                       |
|                            |           |               | MeJA                           | <i>A.Brassicicola</i> |                | MeJA                           | <i>A.Brassicicola</i> |
| AT5G61590                  | ERF107    | 2,05          | -                              | -                     | 5,64E-05       | -                              | -                     |
| AT5G07580                  | ERF106    | 1,84          | -                              | -                     | 1,30E-05       | -                              | -                     |
| AT5G61600                  | ERF104    | 2,81          | -                              | -                     | 9,49E-13       | -                              | -                     |
| AT5G47230                  | ERF5      | 2,58          | -                              | -                     | 6,03E-17       | -                              | -                     |
| AT4G17490                  | ERF6      | 3,38          | -                              | 3,39                  | 2,67E-15       | -                              | 3,23E-02              |
| AT4G17500                  | ERF-1     | 2,94          | 3,69                           | 2,28                  | 3,81E-23       | 1,59E-03                       | 1,16E-02              |
| AT5G47220                  | ERF2      | 2,84          | 3,53                           | 2,17                  | 2,82E-12       | 2,80E-04                       | 2,05E-03              |
| AT1G03800                  | ERF10     | 4,98          | 2,67                           | -                     | 1,24E-08       | 1,12E-02                       | -                     |
| AT5G64750                  | ABR1      | 3,45          | -                              | -                     | 4,37E-19       | -                              | -                     |
| AT5G61890                  | ERF114    | 17,50         | -                              | -                     | 2,25E-46       | -                              | -                     |
| AT1G71520                  |           | 8,43          | -                              | -                     | 9,16E-31       | -                              | -                     |
| AT1G74930                  | ORA47     | 4,03          | -                              | -                     | 1,52E-13       | -                              | -                     |
| AT4G06746 <sup>2</sup>     | RAP2.9    | 2,05          | 1,69                           | -                     | 4,21E-04       | 3,88E-02                       | -                     |
| AT5G67190                  | DEAR2     | 2,04          | -                              | -                     | 6,67E-04       | -                              | -                     |
| AT4G11280 <sup>2</sup>     | ACS6      | 2,42          | -                              | -                     | 2,13E-15       | -                              | -                     |
| AT1G73500                  | MKK9      | 4,55          | -                              | -                     | 3,65E-62       | -                              | -                     |
| AT1G18330                  | RVE7      | 2,00          | -                              | -                     | 7,81E-10       | -                              | -                     |
| AT3G15356 <sup>2</sup>     | LEC       | 2,25          | -                              | -                     | 4,64E-16       | -                              | -                     |
| AT5G05730 <sup>1</sup>     | ASA1      | 1,71          | -                              | -                     | 1,44E-03       | -                              | -                     |
| AT3G50060                  | MYB77     | 2,61          | -                              | -                     | 1,26E-09       | -                              | -                     |
| AT3G51430                  | SSL5      | 1,85          | -                              | -                     | 3,81E-04       | -                              | -                     |
| AT5G17490                  | RGL3      | 2,30          | -                              | -                     | 3,73E-05       | -                              | -                     |
| AT4G37260                  | MYB73     | 2,32          | -                              | -                     | 8,19E-05       | -                              | -                     |
| AT1G71030                  | MYBL2     | 3,41          | -                              | -                     | 4,24E-07       | -                              | -                     |
| AT1G15520                  | ABCG40    | 4,03          | -                              | -                     | 1,92E-11       | -                              | -                     |
| AT1G01480                  | ACS2      | 2,93          | -                              | -                     | 3,50E-05       | -                              | -                     |
| AT4G08040                  | ACS11     | 3,15          | -                              | -                     | 3,39E-07       | -                              | -                     |
| AT4G11650 <sup>1,2</sup>   | OSM34     | 2,98          | -                              | -                     | 8,67E-05       | -                              | -                     |
| AT4G37990 <sup>1</sup>     | ELI3-2    | 59,88         | -                              | -                     | 1,42E-31       | -                              | -                     |
| AT1G67980 <sup>1</sup>     | CCOAMT    | 9,55          | -                              | -                     | 2,14E-12       | -                              | -                     |
| AT1G75040 <sup>1</sup>     | PR5       | 3,85          | -                              | -                     | 4,64E-04       | -                              | -                     |
| AT1G30720 <sup>1</sup>     |           | 3,08          | -                              | -                     | 4,10E-17       | -                              | -                     |
| AT5G20230 <sup>1</sup>     | BCB       | 5,85          | -                              | -                     | 1,56E-22       | -                              | -                     |
| AT2G29460 <sup>1</sup>     | GSTU4     | 4,46          | -                              | -                     | 5,06E-21       | -                              | -                     |
| AT2G02930 <sup>1,2</sup>   | GSTF3     | 4,81          | -                              | -                     | 1,46E-31       | -                              | -                     |
| AT2G30770 <sup>1</sup>     | CYP71A13  | 17,74         | -                              | -                     | 7,83E-05       | -                              | -                     |
| AT2G45570 <sup>1</sup>     | CYP76C2   | 7,53          | -                              | -                     | 3,82E-19       | -                              | -                     |
| AT5G44420 <sup>1,2,3</sup> | PDF1.2    | 5,69          | -                              | -                     | 2,38E-02       | -                              | -                     |
| AT4G27410 <sup>1</sup>     | RD26      | 2,68          | -                              | -                     | 8,95E-15       | -                              | -                     |
| AT4G37370 <sup>1</sup>     | CYP81D8   | 17,06         | -                              | -                     | 1,06E-233      | -                              | -                     |
| AT5G07440 <sup>1</sup>     | GDH2      | 1,73          | -                              | -                     | 7,50E-06       | -                              | -                     |
| AT3G48360 <sup>1</sup>     | BT2       | 1,92          | -                              | -                     | 3,50E-04       | -                              | -                     |

Continuation of **Table S3**

| AGI code                 | Gene name | Fold change   |                                |                        | <i>P</i> value |                                |                        |
|--------------------------|-----------|---------------|--------------------------------|------------------------|----------------|--------------------------------|------------------------|
|                          |           | XVE:<br>JSI-1 | McGrath <i>et al.</i> , (2005) |                        | XVE:<br>JSI-1  | McGrath <i>et al.</i> , (2005) |                        |
|                          |           |               | MeJA                           | <i>A. Brassicicola</i> |                | MeJA                           | <i>A. Brassicicola</i> |
| AT1G03220 <sup>1</sup>   |           | 3,28          | -                              | -                      | 9,39E-95       | -                              | -                      |
| AT5G26340 <sup>1</sup>   | MSS1      | 2,09          | -                              | -                      | 1,55E-06       | -                              | -                      |
| AT2G14610 <sup>1</sup>   | PR1       | 226,45        | -                              | -                      | 7,82E-17       | -                              | -                      |
| AT1G30730 <sup>1</sup>   |           | 10,29         | -                              | -                      | 8,53E-52       | -                              | -                      |
| AT3G09010 <sup>1</sup>   |           | 2,51          | -                              | -                      | 1,44E-07       | -                              | -                      |
| AT2G43570 <sup>1</sup>   | CHI       | 3,75          | -                              | -                      | 8,55E-08       | -                              | -                      |
| AT1G30700 <sup>1</sup>   |           | 2,31          | -                              | -                      | 1,02E-10       | -                              | -                      |
| AT4G03420 <sup>1</sup>   |           | 1,84          | -                              | -                      | 8,20E-05       | -                              | -                      |
| AT1G78860 <sup>1</sup>   |           | 1,96          | -                              | -                      | 1,77E-07       | -                              | -                      |
| AT1G03230 <sup>1</sup>   |           | 1,46          | -                              | -                      | 3,50E-26       | -                              | -                      |
| AT5G25930 <sup>1</sup>   |           | 2,36          | -                              | -                      | 9,42E-09       | -                              | -                      |
| AT4G04610 <sup>1</sup>   | APR1      | 2,30          | -                              | -                      | 3,05E-10       | -                              | -                      |
| AT4G25900 <sup>1</sup>   |           | 1,92          | -                              | -                      | 1,85E-08       | -                              | -                      |
| AT3G08760 <sup>1</sup>   | ATSIK     | 1,71          | -                              | -                      | 2,20E-04       | -                              | -                      |
| AT3G16530 <sup>2</sup>   |           | 4,15          | -                              | -                      | 5,79E-98       | -                              | -                      |
| AT1G72910 <sup>2</sup>   |           | 2,28          | -                              | -                      | 5,55E-05       | -                              | -                      |
| AT5G03350 <sup>2</sup>   | LLP       | 11,15         | -                              | -                      | 5,18E-09       | -                              | -                      |
| AT5G27420 <sup>2</sup>   | CNI1      | 2,86          | -                              | -                      | 2,03E-09       | -                              | -                      |
| AT2G23770 <sup>2</sup>   | LYK4      | 2,28          | -                              | -                      | 5,88E-15       | -                              | -                      |
| AT5G61160 <sup>2</sup>   | AACT1     | 3,49          | -                              | -                      | 1,31E-05       | -                              | -                      |
| AT1G15125 <sup>2</sup>   |           | 4,24          | -                              | -                      | 1,17E-35       | -                              | -                      |
| AT1G66700 <sup>2</sup>   | PXMT1     | 3,36          | -                              | -                      | 1,80E-04       | -                              | -                      |
| AT4G21990 <sup>2</sup>   | APR3      | 1,92          | -                              | -                      | 1,50E-03       | -                              | -                      |
| AT1G67810 <sup>2</sup>   | SUFE2     | 2,16          | -                              | -                      | 9,06E-05       | -                              | -                      |
| AT2G29350 <sup>1,2</sup> | SAG13     | 48,14         | -                              | -                      | 2,01E-10       | -                              | -                      |
| AT4G02520 <sup>2</sup>   | GSTF2     | 4,38          | -                              | -                      | 2,00E-29       | -                              | -                      |
| AT1G69920 <sup>2</sup>   | GSTU12    | 10,12         | -                              | -                      | 2,66E-06       | -                              | -                      |
| AT1G02930 <sup>2</sup>   | GSTF6     | 4,48          | -                              | -                      | 4,71E-20       | -                              | -                      |
| AT1G02920 <sup>1,2</sup> | GSTF7     | 5,89          | -                              | -                      | 8,17E-30       | -                              | -                      |
| AT3G26200 <sup>2</sup>   | CYP71B22  | 2,70          | -                              | -                      | 3,18E-03       | -                              | -                      |
| AT3G23550 <sup>2</sup>   | DTX18     | 2,62          | -                              | -                      | 2,77E-05       | -                              | -                      |
| AT3G56710 <sup>2</sup>   | SIB1      | 6,77          | -                              | -                      | 4,23E-09       | -                              | -                      |
| AT5G25250 <sup>2</sup>   | FLOT1     | 4,02          | -                              | -                      | 2,62E-24       | -                              | -                      |
| AT1G26380 <sup>2</sup>   | FOX1      | 165,06        | -                              | -                      | 7,92E-124      | -                              | -                      |
| AT5G42530 <sup>2</sup>   |           | 18,85         | -                              | -                      | 1,98E-12       | -                              | -                      |

Genes upregulated in *A. thaliana* XVE-Jsi1-mCherry lines upon Jsi1 induction. <sup>1</sup>Genes upregulated in XVE-Jsi1-mCherry lines shared with *A. thaliana* 35S-ERF1 line (Lorenzo *et al.*, 2003), and/or *A. thaliana* XVE-ORA59 line<sup>2</sup> (Pré *et al.*, 2008). <sup>3</sup>PDF1.2 induction was not detected in the RNAseq of Jsi1 lines but was detected in the qRT-PCR assay. Fold change and *P* values of genes upregulated by methyl jasmonate (MeJa) and/or *Alternaria Brassicicola* (*A. Brassicicola*) were obtained from McGrath *et al.*, (2005).

**Table S4.** Gene upregulated in *A. thaliana* XVE-jsi1mCh lines upon Jsi1 expression enriched for ERFs transcription binding sites.

| Promoter Analysis <sup>1</sup> | AGI code  |
|--------------------------------|-----------|
| ERF3 ERF4 ERF8 ERF10 ERF11     | AT5G43980 |
|                                | AT3G57690 |
|                                | AT5G62770 |
|                                | AT1G12940 |
|                                | AT4G39980 |
|                                | AT2G36640 |
|                                | AT1G11260 |
|                                | AT1G71770 |
|                                | AT4G06746 |
|                                | AT1G22110 |
|                                | AT1G16130 |
|                                | AT2G33580 |
|                                | AT4G17500 |
|                                | AT4G24110 |
|                                | AT5G52300 |
|                                | AT1G52200 |
|                                | AT4G39955 |
|                                | AT1G30780 |
|                                | AT4G24570 |
|                                | AT2G29670 |
|                                | AT5G67430 |
|                                | AT1G80760 |
|                                | AT3G44830 |
|                                | AT1G12950 |
|                                | AT2G30550 |
|                                | AT1G69600 |
|                                | AT3G29670 |
|                                | AT1G03220 |
|                                | AT3G55840 |
|                                | AT2G42760 |
|                                | AT5G67420 |
|                                | AT5G67190 |
|                                | AT5G39020 |
|                                | AT5G50450 |
|                                | AT5G16370 |
|                                | AT5G09800 |
|                                | AT2G38290 |
|                                | AT1G75000 |
|                                | AT3G10720 |

---

**Continuation of Table S4**

---

| Promoter Analysis <sup>1</sup> | AGI code  |
|--------------------------------|-----------|
| ERF3 ERF4 ERF8 ERF10 ERF11     | AT3G07350 |
|                                | AT5G62280 |
|                                | AT2G18700 |
|                                | AT1G15840 |
|                                | AT3G03440 |
|                                | AT1G23760 |
|                                | AT1G30730 |
|                                | AT2G45760 |
|                                | AT1G06570 |
|                                | AT1G55850 |
|                                | AT5G64720 |
|                                | AT1G76600 |
|                                | AT5G57220 |
|                                | AT3G53040 |
|                                | AT3G04640 |
|                                | AT5G64750 |
|                                | AT1G56060 |
|                                | AT1G03800 |
|                                | AT1G30720 |
|                                | AT5G63160 |
|                                | AT3G10040 |
|                                | AT3G57240 |
|                                | AT4G18170 |
|                                | AT2G23320 |
|                                | AT2G34355 |
|                                | AT3G52480 |
|                                | AT4G17490 |
|                                | AT5G58770 |
|                                | AT2G24550 |
|                                | AT1G23390 |
|                                | AT5G47220 |
|                                | AT1G73880 |
|                                | AT5G16340 |
|                                | AT5G06320 |
|                                | AT1G05300 |
|                                | AT3G03470 |
|                                | AT1G30740 |
|                                | AT2G19500 |
|                                | AT4G37260 |
|                                | AT1G02660 |
|                                | AT1G31290 |

---



---

**Continuation of Table S4**

---

| Promoter Analysis <sup>1</sup> | AGI code                                                                                                                                                                                                                                                         |
|--------------------------------|------------------------------------------------------------------------------------------------------------------------------------------------------------------------------------------------------------------------------------------------------------------|
| ERF3 ERF4 ERF8 ERF10 ERF11     | AT2G41905<br>AT4G00390<br>AT1G71030<br>AT1G78410<br>AT1G75040                                                                                                                                                                                                    |
| ERF3 ERF4 ERF8 ERF11           | AT5G42380<br>AT5G56270<br>AT3G56620<br>AT2G44578<br>AT5G43590<br>AT4G28420<br>AT5G66070<br>AT5G20250<br>AT1G23550<br>AT1G20310<br>AT1G74790<br>AT3G56880<br>AT5G48560<br>AT5G61600                                                                               |
| ERF3 ERF4 ERF10 ERF11          | AT3G56710<br>AT1G49780                                                                                                                                                                                                                                           |
| ERF4 ERF8 ERF10 ERF11          | AT1G21680<br>AT3G50060<br>AT5G33290<br>AT5G60680<br>AT1G69920<br>AT3G51190<br>AT3G05200<br>AT4G20830<br>AT2G17880<br>AT5G10760<br>AT3G16530<br>AT2G32150<br>AT1G28480<br>AT3G54140<br>AT5G48430<br>AT4G11650<br>AT1G30280<br>AT1G19380<br>AT1G53080<br>AT3G04050 |

---

---

**Continuation of Table S4**

---

| Promoter Analysis <sup>1</sup> | AGI code  |
|--------------------------------|-----------|
| ERF4 ERF8 ERF10 ERF11          | AT4G21320 |
|                                | AT3G53960 |
|                                | AT1G01480 |
|                                | AT2G41410 |
|                                | AT5G63130 |
|                                | AT3G56400 |
|                                | AT5G22140 |
|                                | AT1G11210 |
|                                | AT3G19010 |
|                                | AT4G23810 |
|                                | AT5G01330 |
|                                | AT4G37690 |
|                                | AT5G19120 |
|                                | AT1G10140 |
|                                | AT1G14890 |
|                                | AT5G17490 |
| AT4G12330                      |           |
| AT2G18620                      |           |
| ERF3 ERF4 ERF11                | AT1G77120 |
|                                | AT1G09500 |
| ERF3 ERF8 ERF11                | AT1G75960 |
| ERF4 ERF8 ERF10                | AT1G72100 |
|                                | AT5G05440 |
| ERF4 ERF8 ERF11                | AT2G23150 |
|                                | AT4G01870 |
|                                | AT3G45680 |
|                                | AT5G03350 |
|                                | AT4G29610 |
|                                | AT1G07160 |
|                                | AT5G10625 |
|                                | AT5G10380 |
|                                | AT2G38640 |
|                                | AT1G71140 |
|                                | AT2G32680 |
|                                | AT5G41750 |
|                                | AT1G73500 |
|                                | AT5G61890 |
|                                | AT1G55910 |
|                                | AT5G63790 |
| AT1G02450                      |           |
| AT4G03460                      |           |
| AT2G32800                      |           |

---

---

**Continuation of Table S4**

---

| Promoter Analysis <sup>1</sup> | AGI code  |
|--------------------------------|-----------|
| ERF4 ERF8 ERF11                | AT4G32780 |
| ERF4 ERF10 ERF11               | AT1G14880 |
|                                | AT4G30450 |
|                                | AT2G25900 |
|                                | AT3G09940 |
|                                | AT5G17760 |
|                                | AT1G17310 |
|                                | AT1G14200 |
| ERF8 ERF10 ERF11               | AT2G47140 |
|                                | AT1G22220 |
|                                | AT1G03230 |
| ERF3 ERF11                     | AT5G54300 |
| ERF4 ERF8                      | AT1G23710 |
| ERF4 ERF10                     | AT2G40000 |
| ERF4 ERF11                     | AT1G25550 |
|                                | AT1G56250 |
|                                | AT1G72900 |
|                                | AT5G25240 |
|                                | AT3G62950 |
|                                | AT5G05730 |
|                                | AT3G53160 |
|                                | AT3G46090 |
|                                | AT2G34870 |
|                                | AT1G74940 |
|                                | AT1G04770 |
|                                | AT2G33160 |
|                                | AT2G44370 |
|                                | AT1G33475 |
|                                | AT3G20395 |
|                                | AT3G02800 |
| ERF8 ERF10                     | AT4G28350 |
|                                | AT4G29190 |
|                                | AT4G26080 |
|                                | AT1G21670 |
|                                | AT4G28240 |
|                                | AT5G05340 |
| ERF8 ERF11                     | AT4G14680 |
|                                | AT5G26340 |
|                                | AT3G48850 |
|                                | AT1G08050 |
|                                | AT4G04510 |
|                                | AT3G43850 |

---

---

**Continuation of Table S4**

---

| Promoter analysis <sup>1</sup> | AGI code                                                                                                                                                                                                                                                                                                |
|--------------------------------|---------------------------------------------------------------------------------------------------------------------------------------------------------------------------------------------------------------------------------------------------------------------------------------------------------|
| ERF10 ERF11                    | AT1G70920<br>AT2G43570                                                                                                                                                                                                                                                                                  |
| ERF3                           | AT1G65730                                                                                                                                                                                                                                                                                               |
| ERF4                           | AT2G18540<br>AT3G11840                                                                                                                                                                                                                                                                                  |
| ERF8                           | AT4G27410<br>AT4G36040<br>AT5G07550<br>AT5G60900<br>AT2G19810<br>AT2G34010<br>AT3G50770<br>AT2G38820<br>AT5G47230<br>AT4G21380<br>AT3G45660<br>AT1G04180<br>AT1G15010<br>AT1G35350<br>AT1G62940<br>AT1G16150<br>AT2G03170<br>AT1G35140<br>AT3G02040<br>AT5G38490<br>AT2G27830<br>AT2G20670<br>AT3G59080 |
| ERF10                          | AT3G20300<br>AT4G22530<br>AT2G46150<br>AT4G04500<br>AT1G69150<br>AT5G49620<br>AT4G23200<br>AT5G53870<br>AT3G18250<br>AT5G04340<br>AT3G17520<br>AT1G30700<br>AT4G10960<br>AT5G10830                                                                                                                      |

---

---

**Continuation of Table S4**

---

| Promoter Analysis <sup>1</sup> | AGI code  |
|--------------------------------|-----------|
| ERF10                          | AT1G24130 |
|                                | AT1G71520 |
|                                | AT4G39830 |
|                                | AT5G41610 |
|                                | AT4G39610 |
|                                | AT2G41100 |
| ERF11                          | AT3G63380 |
|                                | AT3G15670 |
|                                | AT1G33960 |
|                                | AT4G11280 |
|                                | AT3G13840 |
|                                | AT3G26830 |
|                                | AT3G10985 |
|                                | AT5G44567 |
|                                | AT1G22890 |
|                                | AT5G63800 |
|                                | AT4G03420 |
|                                | AT5G47850 |
|                                | AT5G21940 |
|                                | AT1G49640 |
|                                | AT3G61390 |
| AT1G25400                      |           |

---

<sup>1</sup>Direct target genes of ERFs were obtained from published DAP-seq data (O'Malley *et al.*, 2016).

## References

- Aichinger C, Hansson K, Eichhorn H, Lessing F, Mannhaupt G, Mewes W, Kahmann R. 2003.** Identification of plant-regulated genes in *Ustilago maydis* by enhancer-trapping mutagenesis. *Molecular Genetics and Genomics* **270**: 303-314.
- Ausubel, F.M., Brenz, R., Kongston, R.E., Moore, D.D., Seidmann, J.G., Smith, J.A. & K. Strukl. 1987.** Current protocols in molecular microbiology. John Wiley & Sons, Inc., USA
- Bouton C, King RC, Chen H, Azhakanandam K, Bieri S, Hammond-Kosack KE, Kanyuka K. 2018.** Foxtail mosaic virus: A viral vector for protein expression in cereals. *Plant physiology* **177**: 1352-1367.
- Brown RL, Kazan K, McGrath KC, Maclean DJ, Manners JM. 2003.** A role for the GCC-box in jasmonate-mediated activation of the *PDF1. 2* gene of Arabidopsis. *Plant physiology* **132**, 1020-1032.
- Djamei A, Schipper K, Rabe F, Ghosh A, Vincon V, Kahnt J, Osorio S, Tohge T, Fernie AR, Feussner I et al. 2011.** Metabolic priming by a secreted fungal effector. *Nature* **478**: 395-398.
- Fernández-Bautista N, Domínguez-Núñez JA, Moreno MC, Berrocal-Lobo M. 2016.** Plant tissue trypan blue staining during phytopathogen infection. *The plant journal* **24**: 1-7.
- Iven T, König S, Singh S, Braus-Stromeier SA, Bischoff M, Tietze LF, Braus GH, Lipka V, Feussner I, Dröge-Laser W. 2012.** Transcriptional activation and production of tryptophan-derived secondary metabolites in Arabidopsis roots contributes to the defense against the fungal vascular pathogen *Verticillium longisporum*. *Molecular Plant* **5**: 1389-1402.
- Kämper J, Kahmann R, Bölker M, Ma LJ, Brefort T, Saville BJ, Banuett F, Kronstad JW, Gold SE, Müller O et al. 2006.** Insights from the genome of the biotrophic fungal plant pathogen *Ustilago maydis*. *Nature* **444**: 97-101.
- Kim JH, Lee S-R, Li L-H, Park H-J, Park J-H, Lee KY, Kim M-K, Shin BA, Choi S-Y. 2011.** High Cleavage Efficiency of a 2A Peptide Derived from Porcine Teschovirus-1 in Human Cell Lines, Zebrafish and Mice. *PLOS ONE* **6**: e18556.
- Lanver D, Müller AN, Happel P, Schweizer G, Haas FB, Franitza M, Pellegrin C, Reissmann S, Altmüller J, Rensing SA et al. 2018.** The biotrophic development of *Ustilago maydis* studied by RNA-Seq analysis. *The Plant Cell* **30**: 300-323.

- Lampropoulos A, Sutikovic Z, Wenzl C, Maegele I, Lohmann JU, Forner J. 2013.** GreenGate-A novel, versatile, and efficient cloning system for plant transgenesis. *PLoS One* **8**:e83043.
- Liu X, Sun Y, Kørner CJ, Du X, Vollmer ME, Pajerowska-Mukhtar KM. 2015.** Bacterial Leaf Infiltration Assay for Fine Characterization of Plant Defense Responses using the *Arabidopsis thaliana*-*Pseudomonas syringae* Pathosystem. *JoVE* e53364.
- Lin F, Jiang L, Liu Y, Lv Y, Dai H, Zhao H. 2014.** Genome-wide identification of housekeeping genes in maize. *Plant molecular biology* **86**: 543-554.
- Lorenzo O, Piqueras R, Sánchez-Serrano JJ, Solano R. 2003.** ETHYLENE RESPONSE FACTOR1 integrates signals from ethylene and jasmonate pathways in plant defense. *The Plant Cell* **15**: 165-178.
- McGrath KC, Dombrecht B, Manners JM, Schenk PM, Edgar CI, Maclean DJ, Scheible WR, Udvardi MK, Kazan K. 2005.** Repressor-and activator-type ethylene response factors functioning in jasmonate signaling and disease resistance identified via a genome-wide screen of *Arabidopsis* transcription factor gene expression. *Plant physiology* **139**: 949-959.
- O'Malley RC, Huang SSC, Song L, Lewsey MG, Bartlett A, Nery JR, Galli M, Gallavotti A, Ecker JR. 2016.** Cistrome and epicistrome features shape the regulatory DNA landscape. *Cell* **165**: 1280-1292.
- Pré M, Atallah M, Champion A, De Vos M, Pieterse CM, Memelink J. 2008.** The AP2/ERF domain transcription factor ORA59 integrates jasmonic acid and ethylene signals in plant defense. *Plant physiology* **147**: 1347-1357.
- Sambrook J, Russell DW. 2006.** Purification of Nucleic Acids by Extraction with Phenol:Chloroform. *Cold Spring Harbor Protocols* 2006: pdb.prot4455.
- Schellingen K, Van Der Straeten D, Vandenbussche F, Prinsen E, Remans T, Vangronsveld J, Cuypers A. 2014.** Cadmium-induced ethylene production and responses in *Arabidopsis thaliana* rely on ACS2 and ACS6 gene expression. *BMC Plant Biology* **14.1**: 214.
- Uhse S, Pflug FG, Stirnberg A, Ehrlinger K, von Haeseler A, Djamei A. 2018.** In vivo insertion pool sequencing identifies virulence factors in a complex fungal–host interaction. *PLoS biology* **16**: e2005129.
- Zhang T, Maruhnich SA, Folta KM. 2011.** Green light induces shade avoidance symptoms. *Plant Physiology* **157**: 1528-1536.

**Zienkiewicz A, Gömann J, König S, Herrfurth C, Liu Y-T, Meldau D, Feussner I. 2020.**

Disruption of Arabidopsis neutral ceramidases 1 and 2 results in specific sphingolipid imbalances triggering different phytohormone-dependent plant cell death programs.

*New Phytologist* **226**: 170-188.
